# Supplementary material for: PARV4 found in wild chimpanzee faeces: an alternate route of transmission?
Source: Springer Nature journal article supplement (doi:10.1007/s00705-018-4073-6), 2018-10-20

**Supplementary material**

All fecal samples were preserved in RNAlaterTM (Ambion Inc., Austin, TX) and stored at −80 °C until further use. DNA was isolated by PSP® Spin Stool DNA Kit (Stratec, Germany) according to manufacturer's instructions. Concentration and purity of isolated DNA was determined by spectrophotometric analysis at 260/280 nm (Infinite® 200 PRO; Tecan, Switzerland). DNA samples were screened using nested PCR based on the

protocol published by Sharp *et al.* (Sharp, LeBreton, et al., 2010). The first round of amplification was performed in a total volume of 14 μl, using “PPP master mix” (Top-Bio, Czech Republic), 0.35 μM primers and 50 ng DNA as a template. One microliter of the first round reaction was used as a DNA template to the second round and amplified in a total volume of 14 μl under similar conditions as the first round. Cycling conditions were the same for both rounds: 5 min at 94 °C, followed by 30 cycles of 18 s at 94 °C, 30 s at 50 °C, 90 s at 72 °C, and a final extension of 10 min at 72 °C. PCR products were visualized in 1% agarose gel and stained with Midori Green Advanced DNA stain (Nippon Genetics Europe GmbH, Germany). PCR products of expected length of 295 nt were gel purified using QIAquick Gel Extraction Kit (Qiagen, Germany) according to manufacturer's instructions, cloned into pGEM®-T Easy Vector System (Promega, USA) and sequenced by Macrogen capillary sequencing services (MacrogenEurope, The Netherlands). Additional sets of primers located in conserved parts of primate tetraparvovirus and other tetraparvoviruses genomes were designed to overlap each other (see Supplementary material). The first round of amplification was performed in total volume of 25 μl using 1.25 U LA Taq DNA polymerases mix (Top-Bio, Czech Republic), 10× LA PCR buffer, 2% DMSO, 500 μMdNTPs mix and 0.5 μM primers. One microliter of the first round product was used as a template to the second round in a total volume of 25 μl, using PPP master mix (Top-Bio, Czech Republic) and 0.5 μM primers. Cycling conditions were the same for all the first rounds of PCR: 5min at 94 °C, 30 cycles of 15 s at 94 °C, 30 s at 50 °C, 150 s at 68 °C, and 10 min at 68 °C as final extension. Cycling conditions for the second round were the same except annealing temperatures: 5 min at 94 °C, followed by 30 cycles of 15 s at 94 °C, 30 s at 44/45/50/52 °C, 2 min at 72 °C, and 10 min at 72 °C as a final extension. PCR products were purified, cloned and both strands sequenced as described above.

All obtained sequences were carefully edited using Geneious 11.0.2 (Kearse et al., 2012) and compared with those available in the GenBank database by BLASTn algorithm (http://blast.ncbi.nlm.nih.gov/Blast.cgi). Whole genome alignments were generated using the ClustalW algorithm. For coding sequences, the nucleotide datasets were translated into amino acids and aligned using the ClustalW algorithm and aligned sequences were translated back to nucleotides (TransAlign, Geneious 11.0.2); ambiguously aligned regions were eliminated using Gblocks (Talavera et al. 2007 SystBiol). Pairwise nucleotide distances were calculated by Geneious software as the proportion (p) of nucleotide sites/amino acids at which two sequences being compared are different. Phylogenetic trees were inferred by maximum likelihood method using IQ-TREE v. 1.6.beta4 (Nguyen et al., 2015). For each dataset, best-fit evolution model was chosen based on the Bayesian information criterion (BIC) computed by ModelFinder (Kalyaanamoorthy et al., 2017). Branch supports were assessed by the ultrafast bootstrap (UFBoot) approximation (Minh et al., 2013) and by SH-like approximate likelihood ratio test (SH-aLRT) (Guindon et al., 2010). Trees were visualized and edited using FigTree v1.4.1 (<http://tree.bio.ed.ac.uk/software/figtree/>) and Inkscape 0.91.

**Table S1**: Host species and number of tested samples from Czech and Slovak zoos

| NHP species | No of tested |
| --- | --- |
| *Pan troglodytes* | 25 |
| *Gorilla gorilla* | 10 |
| *Thercopithecus gelada* | 5 |
| *Mandrillus sphinx* | 12 |
| *Papio anubis* | 4 |
| *Papio hamadryas* | 18 |
| *Colobus guereza* | 12 |
| *Colobus angolensis* | 6 |
| *Lophocebus aterrimus* | 4 |
| *Erythrocebus patas* | 10 |
| *Chlorocebus sabaeus* | 13 |
| *Cercopithecus campbelli* | 4 |
| *Cercopithecus diana* | 9 |
| *Cercopithecus neglectus* | 8 |
| *Cercopithecus mitis* | 2 |
| Miopithecus ogouensis | 0/5 | 0 |
| Macaca sylvanus | 0/6 | 0 |

**Table S2**: List of primers used for whole genome amplification

| Primer | Sequence | Position (AY622943) |
| --- | --- | --- |
| PARV_F1 | CACCATGGACGCWCCTGCC | 279-297 |
| PARV_F2 | GCCTGGATYGCYGTRCTAC | 295-313 |
| PARV_F3 | TTCATGGATCTTATTGACTGGTT | 955-977 |
| PARV_F4 | GTGCACCAATRGAAGVARCC | 1808-1827 |
| PARV_F5 | GGTTYCCRCMRACCCACTCAG | 1855-1875 |
| PARV_F6 | GATGCTTATCGTCCAGGTGGC | 2390-2410 |
| PARV_F8 | GGCTAAGGAAACTGTTGGTGA | 3283-3303 |
| PARV_F9 | CCTBCYAGCAGRYTRGCWATTATG | 4169-4192 |
| PARV_R4 | TCWGTCATTCTKCCTTCTTCCCA | 1411-1433 |
| PARV_R5 | CGCCTYTTCTTCTGAGTGG | 1868-1885 |
| PARV_R6 | GGACTCGGAGAGGAMAGYTC | 1931-1949 |
| PARV_R7 | CAGAGGATTACCAGGACCAAC | 3050-3070 |
| PARV_R9 | GGRAGYCTGCCYACATCC | 4243-4260 |
| PARV_ R10 | CACTTGTRGCAGGATTYCCAA | 4344-4364 |
| PARV_R11 | CCCAACCACACCTACCTC | 5167-5184 |
| P1 (PARVFo) | TGA AYC AGA CCT TGA RCG SCC | 2992-3012 |
| P2 (PARVRo) | CCM CCH AWC CAY TGA GCT TTW ACT TT | 3500-3525 |
| P3 (PARVFi) | TAY AAT TAT GTT GGT CCT GGT AAT CC | 3041-3066 |
| P4 (PARVRi) | GGT ARR ACC TGY GAW ADT TGA ACA TC | 3311-3336 |

**Table S3: Combination of primers and reaction conditions used for whole genome amplification**

| Primer combination | Reaction | Final product lenght | Annealing temperature |
| --- | --- | --- | --- |
| PARV_F1+PARV_R6 | A1 | 1671 bp | 50°C |
| PARV_F2+PARV_R4 | A2 | 954 bp | 50°C |
| PARV_F3+PARV_R5 | A3 | 932 bp | 50°C |
| PARV_F4+ParvRi | B1 | 1522 bp | 50°C |
| PARV_F5+PARVR7 | B2 | 1209 bp | 52°C |
| PARV_F6+PARV_R7 | B3 | 681 bp | 52°C |
| ParvFi+PARV_R10 | C1 | 1315 bp | 50°C |
| PARV_F8+PARV_R9 | C2 | 978 bp | 45°C |
| PARV_F8+PARV_R11 | D1 | 1941 bp | 50°C |
| PARV_F9+R11 | D2 | 1018 bp | 44°C |

**Figure S1**: Phylogenetic analysis of full-length coding sequences of VP1 of strains belonging to the species *Primate tetraparvovirus 1* by maximum likelihood method using IQTREE software. Herein described strain is highlighted in red. Branch supports are displayed as % from 1000 replicates from SH-aLRT/UFBoot tests. Three different hokoviruses (EU200677, EU200669, JF504699) used as an outgroup are not displayed. Scale bar indicates a number of nucleotide substitutions per site.

**
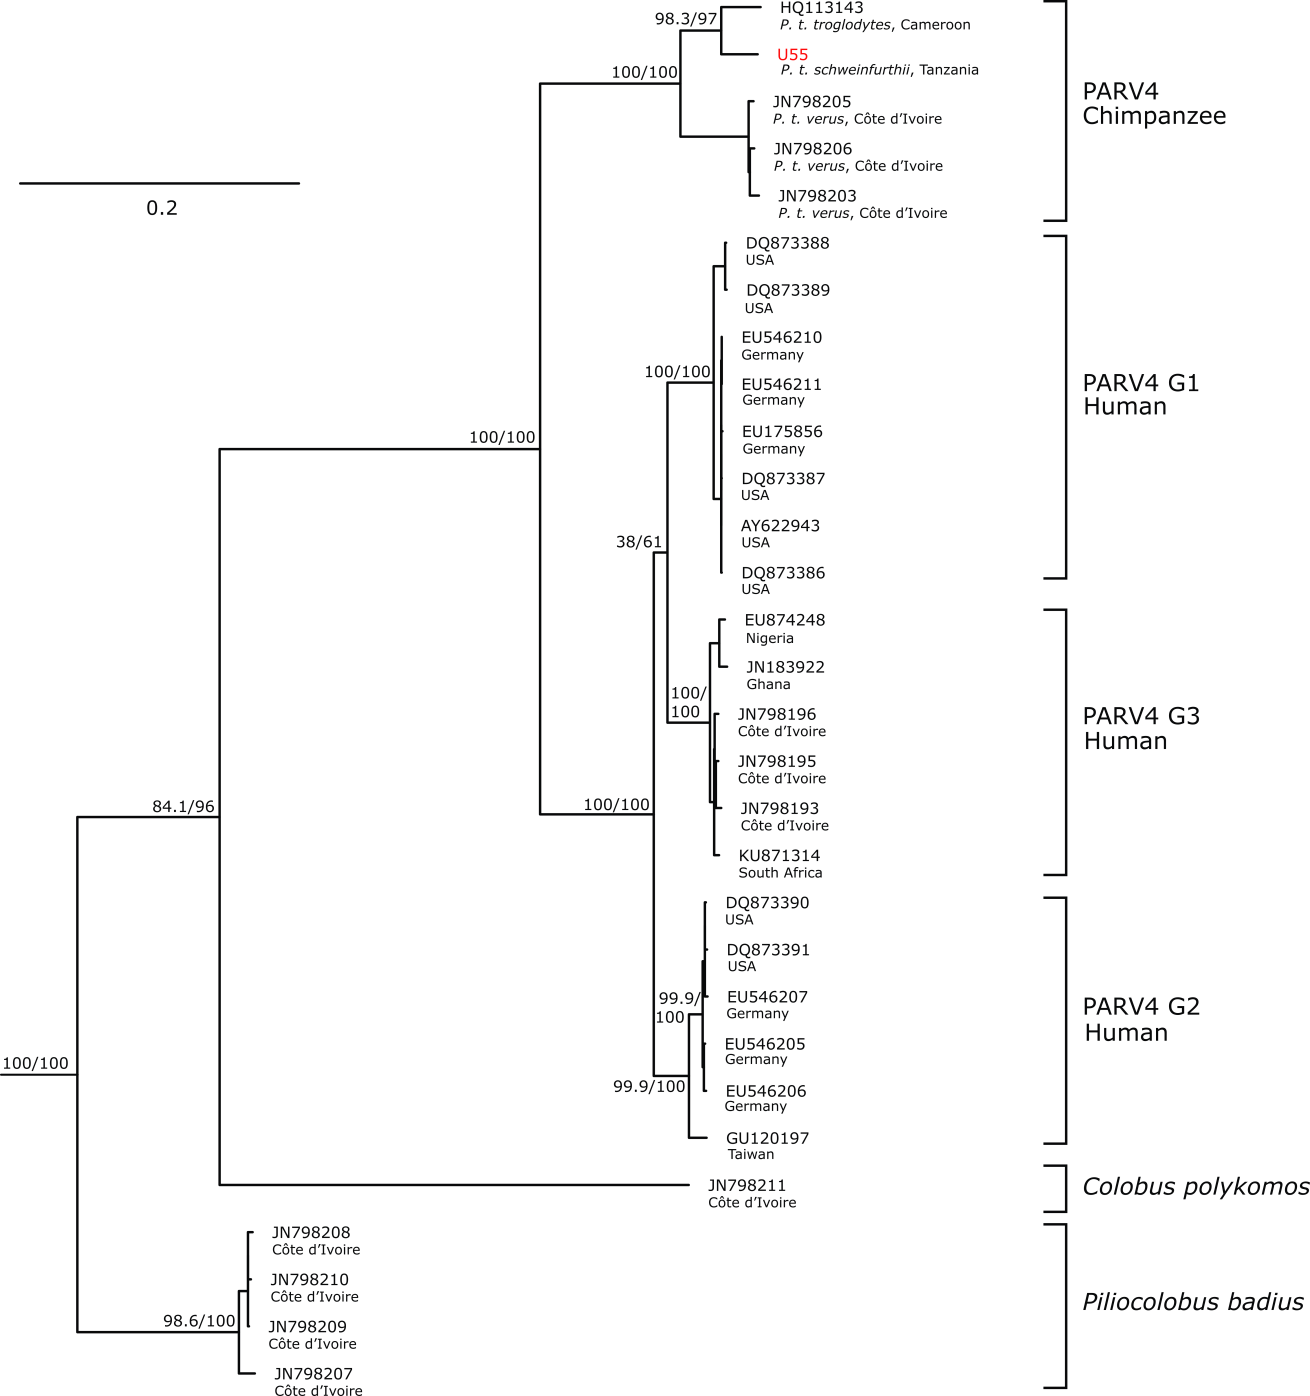
**

**Figure S2**: Phylogenetic analysis of full length genomes of strains belonging to the species *Primate tetraparvovirus 1* by maximum likelihood method using IQTREE software. Herein described strain is highlighted in red. Branch supports are displayed as % from 1000 replicates from SH-aLRT/UFBoot tests. Three different hokoviruses (EU200677, EU200669, JF504699) used as an outgroup are not displayed. Scale bar indicates number of nucleotide substitutions per site.


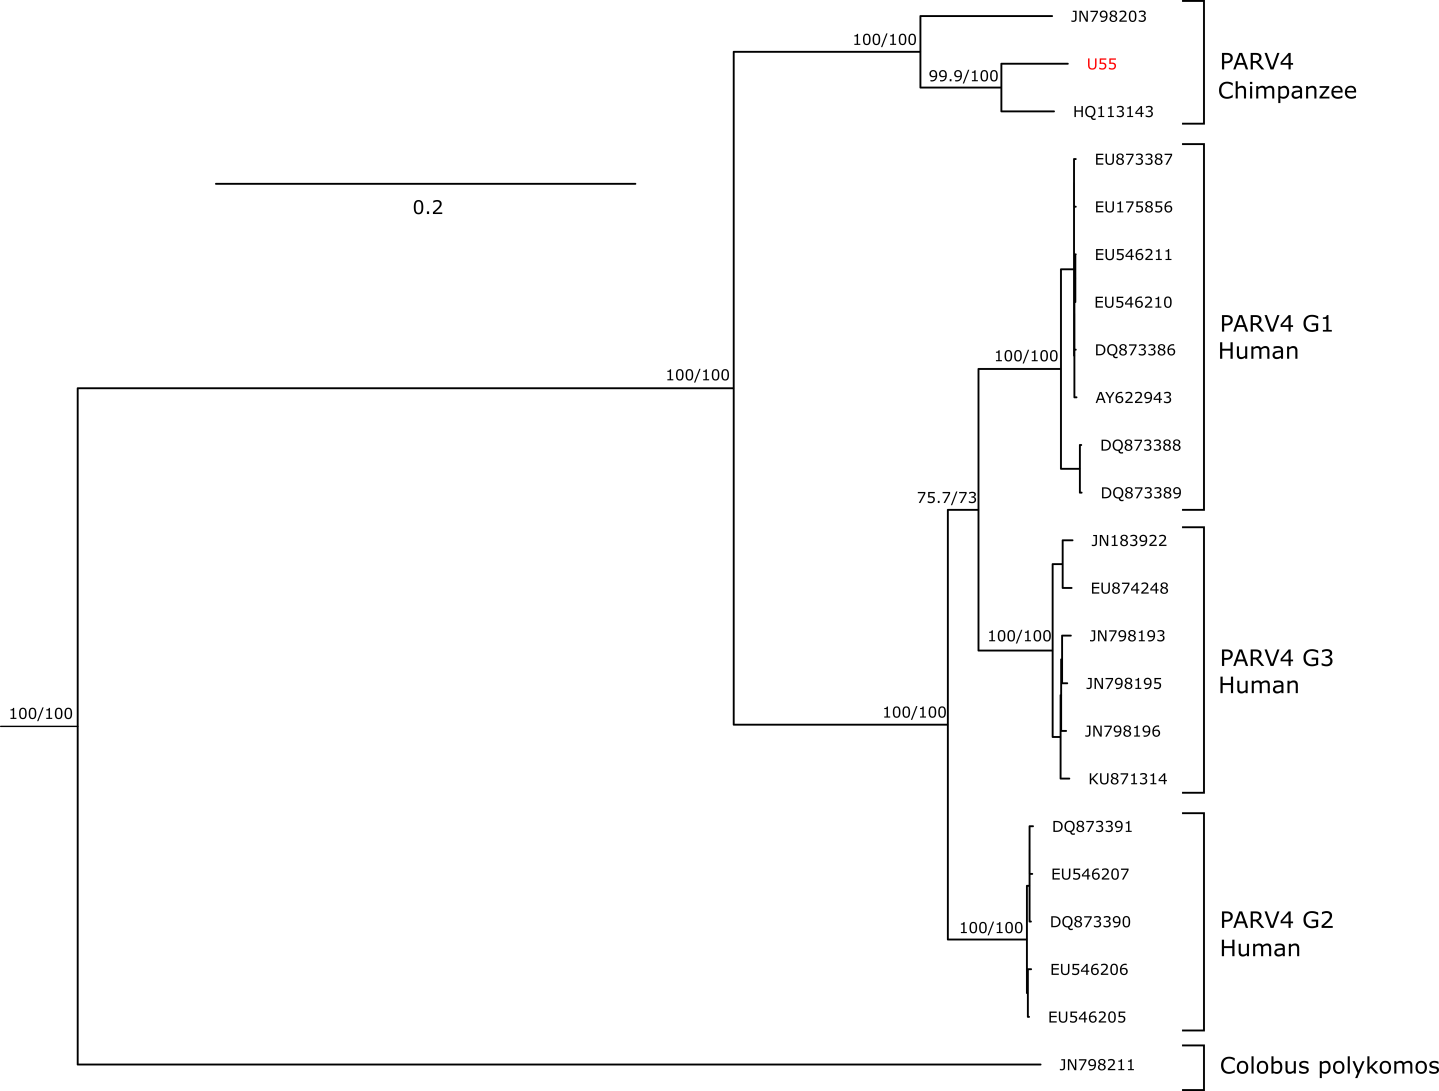

Supplement: MOESM1 [file 16214516]
